# Supplementary material
Source: PubMed Central journal article supplement (PMC8786603)
Supplement: mmc1.pdf [file mmc1.pdf]

**Cell, Volume 185**

**Supplemental information**

**Structural and functional characterizations**

**of infectivity and immune evasion**

**of SARS-CoV-2 Omicron**

**Zhen Cui, Pan Liu, Nan Wang, Lei Wang, Kaiyue Fan, Qianhui Zhu, Kang Wang, Ruihong Chen, Rui Feng, Zijing Jia, Minnan Yang, Ge Xu, Boling Zhu, Wangjun Fu, Tianming Chu, Leilei Feng, Yide Wang, Xinran Pei, Peng Yang, Xiaoliang Sunney Xie, Lei Cao, Yunlong Cao, and Xiangxi Wang**

**Table S1. Cryo-EM data collection and atomic model refinement statistics,  
Related to Figure 1, 2 and 6**

| Name                                       | Omicron S-trimer at pH 7.5 | Omicron S-trimer at pH 5.5 | Delta S-trimer (1 RBD Up) | Delta S-trimer (3 RBD Down) | Omicron S-trimer in complex with hACE2 | Omicron S-trimer-hACE2 interface |
|--------------------------------------------|----------------------------|----------------------------|---------------------------|-----------------------------|----------------------------------------|----------------------------------|
| <b>Data collection</b>                     |                            |                            |                           |                             |                                        |                                  |
| Microscope                                 | FEI Titan Krios            | FEI Titan Krios            | FEI Titan Krios           | FEI Titan Krios             | FEI Titan Krios                        | FEI Titan Krios                  |
| Camera                                     | K3                         | K3                         | K3                        | K3                          | K3                                     | K3                               |
| Voltage (kV)                               | 300                        | 300                        | 300                       | 300                         | 300                                    | 300                              |
| Total dose (e <sup>-</sup> /Å)             | 60                         | 60                         | 60                        | 60                          | 60                                     | 60                               |
| Symmetry imposed                           | C1                         | C1                         | C1                        | C3                          | C1                                     | C1                               |
| <b>Data Processing</b>                     |                            |                            |                           |                             |                                        |                                  |
| Micrographs (Total)                        | 1,777                      | 6,050                      | 3,106                     | 3,106                       | 5,030                                  | 5,030                            |
| Micrographs (Used)                         | 1,777                      | 6,050                      | 3,106                     | 3,106                       | 5,030                                  | 5,030                            |
| Particles selected                         | 830,943                    | 1,789,492                  | 1,317,048                 | 1,317,048                   | 916,297                                | 916,297                          |
| Particles included in final reconstruction | 221,744                    | 371,808                    | 491,247                   | 171,670                     | 293,334                                | 293,334                          |
| <b>Reconstruction</b>                      |                            |                            |                           |                             |                                        |                                  |
| Pixel size (Å)                             | 1.07                       | 1.07                       | 1.07                      | 1.07                        | 1.07                                   | 1.07                             |
| Defocus range (µm)                         | -1.5--2.5                  | -1.5--2.5                  | -1.5--2.5                 | -1.5--2.5                   | -1.5--2.5                              | -1.5--2.5                        |
| Resolution (Å) (FSC = 0.143)               | 3.3                        | 3.9                        | 3.5                       | 3.9                         | 3.5                                    | 3.6                              |
| <b>Model Refinement</b>                    |                            |                            |                           |                             |                                        |                                  |
| Clashscore                                 | 7.1                        | 12.27                      | 7.83                      | 7.93                        | 12.9                                   | 3.68                             |
| Rotamer outliers (%)                       | 0.00                       | 0.03                       | 0.00                      | 0.04                        | 0.05                                   | 0                                |
| Molprobrity score                          | 1.77                       | 2.1                        | 1.79                      | 1.81                        | 2.09                                   | 1.49                             |
| <b>Ramachandran statistics (%)</b>         |                            |                            |                           |                             |                                        |                                  |
| Most favored (%)                           | 94.43                      | 91.69                      | 94.67                     | 94.54                       | 92.58                                  | 95.18                            |
| Allowed (%)                                | 5.51                       | 8.28                       | 5.33                      | 5.46                        | 7.33                                   | 4.82                             |
| Outliers (%)                               | 0.06                       | 0.03                       | 0                         | 0                           | 0.09                                   | 0                                |
| <b>R.m.s. deviations</b>                   |                            |                            |                           |                             |                                        |                                  |
| Bond lengths (Å)                           | 0.003                      | 0.003                      | 0.003                     | 0.003                       | 0.009                                  | 0.006                            |
| Bond angles (°)                            | 0.56                       | 0.611                      | 0.568                     | 0.562                       | 0.641                                  | 1.155                            |
