# Supplementary material
Source: PubMed Central journal article supplement (PMC8786603)
Supplement: mmc2.pdf [file mmc2.pdf]

**Table S2. Residues of Omicron RBD interacting with hACE2 at the binding interface ( $d < 4.5 \text{ \AA}$ )**

| <b>Omicron RBD</b> | <b>hACE2</b>                       |
|--------------------|------------------------------------|
| <b>Residues</b>    | <b>Residues</b>                    |
| Y449               | D38                                |
| L453               | H34                                |
| L455               | D30                                |
| F456               | T27                                |
| A475               | Q24                                |
| G476               | S19                                |
| N477               | S19                                |
| F486               | L79<br>M82                         |
| N487               | Q24                                |
| Y489               | T27<br>F28<br>K31<br>Y83           |
| F490               | K31                                |
| R493               | K31<br>E35                         |
| S494               | H34                                |
| G496               | D38<br>K353                        |
| Q498               | Y41<br>Q42<br>L45                  |
| T500               | Y41<br>L45<br>N330<br>D355<br>R357 |
| Y501               | Y41<br>K353<br>G354                |
| G502               | K353<br>G354                       |
| Y505               | E37<br>K353<br>G354                |
